# Supplementary material
Source: Springer Nature journal article supplement (https://www.springermedizin.de/resource/supplementary/12879_2011_1667_MOESM4_ESM.pdf/9443044)
Supplement: MOESM4 [file 9443044]

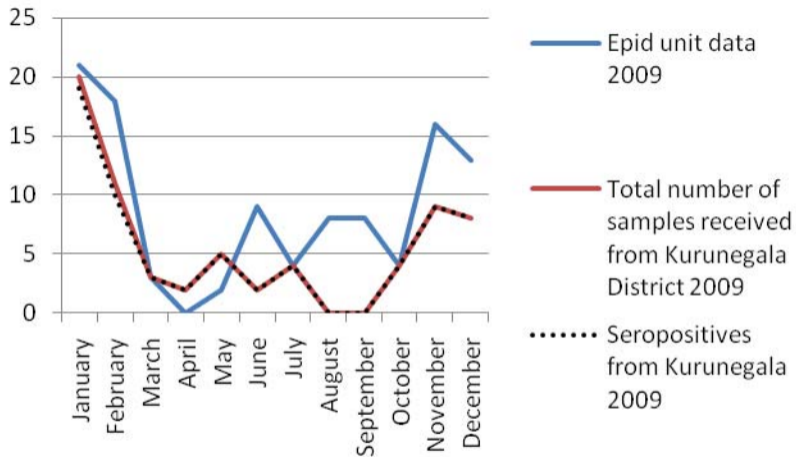

Includes samples received from BH Kuliypitiya and GH Kurunegala, excludes samples received from BH Dambadeniya as data on DOA was not available.
